# Supplementary material
Source: PubMed Central journal article supplement (PMC6382588)
Supplement: NIHMS1517379-supplement-1.pdf [file NIHMS1517379-supplement-1.pdf]

---

**Supplemental Table I. Oligonucleotide sequences (5' to 3')**

---

|                                     |                                     |
|-------------------------------------|-------------------------------------|
| 1 <sup>st</sup> 5' J558             | AGCCTGACATCTGAGGAC                  |
| VDJ4-StuI Fwd                       | CAGCTAAGAAAGGCCTCTCCAG              |
| VDJ4-StuI Rev                       | CTGGAGAGGCCTTTCTTAGCTG              |
| VDJ4-BbvCI Fwd                      | GTCTCCTCAGCTAAGAATGGC               |
| VDJ4-BbvCI Rev                      | GCCATTCTTAGCTGAGGAGAC               |
| Extension J <sub>H</sub> 4 <b>1</b> | GAGCCTCACTCCCATTCTCGG               |
| J <sub>H</sub> 4 <b>2-1</b>         | TCCATACACATACTTCTGTGTTCCCT          |
| Nested J <sub>H</sub> 4 <b>2-2</b>  | TAGATGCCTTTCTCCCTTGACTCA            |
| Probe J <sub>H</sub> 4 <b>3</b>     | GTTGGAAGGAGCTGTCTTAGTG              |
| Top linker                          | ATGCACTACATACAGTCATCCGGAGATCTGAATTC |
| Bottom linker                       | GAATTCAGATCTCC                      |
| <b>LL4</b> linker                   | ATGCACTACATACAGTCATCCGGAG           |
| Nested <b>LL2</b> linker            | CAGTCATCCGGAGATCTGAATTC             |
| <i>Gapdh</i> forward                | TCCACCACCGTGTTGCTGTAG               |
| <i>Gapdh</i> reverse                | GACCACAGTCCATGCCATCACT              |

---

Colors correspond to arrows in Fig. 1.

**Supplemental Table II. Mutation events in the J<sub>H</sub>4 intron**

---

|                    | Events | %    |
|--------------------|--------|------|
| Total mutations    | 2628   |      |
| Base substitutions | 2593   | 98.7 |
| Insertions (1 bp)  | 9      | 0.3  |
| Deletions          |        |      |
| Small (1-2 bp)     | 19     | 0.7  |
| Large (9-164 bp)   | 7      | 0.3  |

---

Data from Maul, R.W. et al. 2016. *J. Exp. Med.* 213: 1675-1683.
